# Supplementary material
Source: PubMed Central journal article supplement (PMC1877909)
Supplement: bmj_334_7603_1105__1.pdf [file bmj_334_7603_1105__1.pdf]

## Web references

- w1. Creed F, Ratcliffe J, Fernandes L, Palmer S, Rigby C, Tomenson B, Guthrie E, Read N, Thompson DG; North of England IBS Research Group. Outcome in severe irritable bowel syndrome with and without accompanying depressive, panic and neurasthenic disorders. *Br J Psychiatry* 2005; 186: 507-15
- w2. Schmulson MJ, Ortiz-Garrido OM, Hinojosa C, Arcila D. A single session of reassurance can acutely improve the self-perception of impairment in patients with IBS. *J Psychosom Res* 2006; 61: 461-67
- w3. Ritchie JA, Truelove SC. Comparison of various treatments for irritable bowel syndrome. *BMJ* 1980; 281: 1317–1319
- w4. Clouse RE, Lustman PJ, Geisman RA, Alpers DH. Antidepressant therapy in 138 patients with irritable bowel syndrome. A five-year clinical experience. *Aliment Pharmacol Ther* 1994; 8: 409–416
- w5. Lynn RB, Friedman LS. Irritable bowel syndrome. *N Eng J Med* 1993; 329: 1940-45
- w6. Gorard DA, Libby GW, Farthing MJ. Influence of antidepressants on whole gut and oro-caecal transit times in health and irritable bowel syndrome. *Aliment Pharmacol Ther* 1994; 8: 159–166
- w7. Tack J, Broekaert D, Corsetti M, Fischler B, Janssens J. Influence of acute serotonin reuptake inhibition on colonic sensorimotor function in man. *Aliment Pharmacol Ther* 2006; 23: 265–74
- w8. Chial HJ, Camilleri M, Ferber I, Delgado-Aros S, Burton D, McKinzie S, Zinsmeister A. Effects of venlafaxine, buspirone, and placebo on colonic sensorimotor functions in healthy humans. *Clin Gastroenterol Hepatol* 2003; 1: 211–18
- w9. Kuiken SD, Tytgat GN, Boeckxstaens GE. The selective serotonin reuptake inhibitor fluoxetine does not change rectal sensitivity and symptoms in patients with irritable bowel syndrome: a double blind, randomized, placebo-controlled study. *Clin Gastroenterol Hepatol* 2003;1: 219–28

- w10. Tabas G, Beaves M, Wang J, Friday P, Mardini H, Arnold G. Paroxetine to treat irritable bowel syndrome not responding to high-fiber diet: a double-blind, placebo controlled trial. *Am J Gastroenterol* 2004; 99: 914–20
- w11. Creed F, Fernandes L, Guthrie E, Palmer S, Ratcliffe J, Read N, Rigby C, Thompson D, Tomenson B; North of England IBS Research Group. The cost effectiveness of psychotherapy and paroxetine for severe irritable bowel syndrome. *Gastroenterology* 2003; 124: 303–17
- w12. Bennett P, Wilkinson S. A comparison of psychological and medical treatment of the irritable bowel syndrome. *Br J Clin Psychol* 1985; 24: 215-216
- w13. Lynch PM, Zamble E. A controlled behavioral treatment study of irritable bowel syndrome. *Behav Ther* 1989;20:509-523
- w14. Green B, Blanchard EB. Cognitive therapy for irritable bowel syndrome. *J Consult Clin Psychol* 1994; 62: 576–82
- w15. Guthrie E, Creed F, Dawson DD, Tomenson B. A randomised controlled trial of psychotherapy in patients with refractory irritable bowel syndrome. *Br J Psychiatry* 1993;163: 315-21
- w16. Boyce PM, Talley NJ, Balaam B, Koloski NA, Truman G. A randomized controlled trial of cognitive behavior therapy, relaxation training, and routine clinical care for the irritable bowel syndrome. *Am J Gastroenterol*. 2003; 98: 2209-2218
- w17. Toner BB, Segal ZV, Emmott S, Myran D, Ali A, DiGasbarro I, Stuckless N. Cognitive-behavioral group therapy for patients with irritable bowel syndrome. *Int J Group Psychother* 1998; 48: 215-243
- w18. van Dulmen AM, Fennis JFM, Bleijenberg G. Cognitive behavioral group therapy for irritable bowel syndrome: effects and long-term follow-up. *Psychosom Med* 1996; 58: 508–14
- w19. Blanchard EB, Scharff L, Payne A, Schwarz SP, Suls JM, Malamood H. Prediction of outcome from cognitive-behavioural treatment of irritable bowel syndrome. *Behav Res Ther* 1992; 30:647–650

- w20. Blanchard EB, Schwarz SP, Neff DF, Gerardi MA. Prediction of outcome from the self-regulatory treatment in irritable bowel syndrome. *Behav Res Ther* 1988; 26:187–190
- w21. Creed F, Guthrie E, Ratcliffe J, Fernandes L, Rigby C, Tomenson B, Read N, Thompson DG. Reported sexual abuse predicts impaired functioning but a good response to psychological treatments in patients with severe irritable bowel syndrome. *Psychosom Med* 2005; 67: 490–9
- w22. Shapiro DA, Cavanagh K, Lomas H. Geographic inequity in the availability of cognitive behavioural therapy in England and Wales. *Behavioural and Cognitive Psychother* 2003; 31: 185-192
- w23. Koloski NA, Talley NJ, Huskic SS, Boyce PM. Predictors of conventional and alternative health care seeking for irritable bowel syndrome and functional dyspepsia? *Aliment Pharmacol Ther* 2003; 17: 841–51
- w24. Palsson OS, Turner MJ, Johnson DA, Burnelt CK, Whitehead WE. Hypnosis treatment for severe irritable bowel syndrome: investigation of mechanism and effects on symptoms. *Dig Dis Sci* 2002; 47: 2605–14
- w25. Whorwell PJ, Prior A, Faragher EB. Controlled trial of hypnotherapy in the treatment of severe refractory irritable bowel syndrome. *Lancet* 1984; 2: 1232–4
